# Supplementary material for: Preparation of gels of chitosan through a hydrothermal reaction in the presence of malonic acid and cinnamaldehyde: characterization and antibacterial activity
Source: Royal Society of Chemistry journal article supplement (doi:10.1039/d1nj04149e), 2021-01-01
Supplement: d1nj04149e1.pdf [file d1nj04149e1.pdf]

## **Preparation of gels of Chitosan through Hydrothermal Reaction in the Presence of Malonic Acid and Cinnamaldehyde: Characterization and Antibacterial Activity**

PrabhaGovindaraj<sup>a\*</sup> SivanesanSubramanian<sup>a</sup> and DhamodharanRaghavachari<sup>b</sup>

<sup>a</sup>Department of Applied Science & Technology, Alagappa College of Technology, Anna University, Chennai 600 025, India

<sup>b</sup>Department of Chemistry, Indian Institute of Technology Madras, Chennai 600036, India

\* Author for Correspondence. E-mail: [gprabhagovinn@gmail.com](mailto:gprabhagovinn@gmail.com)

Number of pages: 6

Number of Figures: 6

Number of Tables: 0

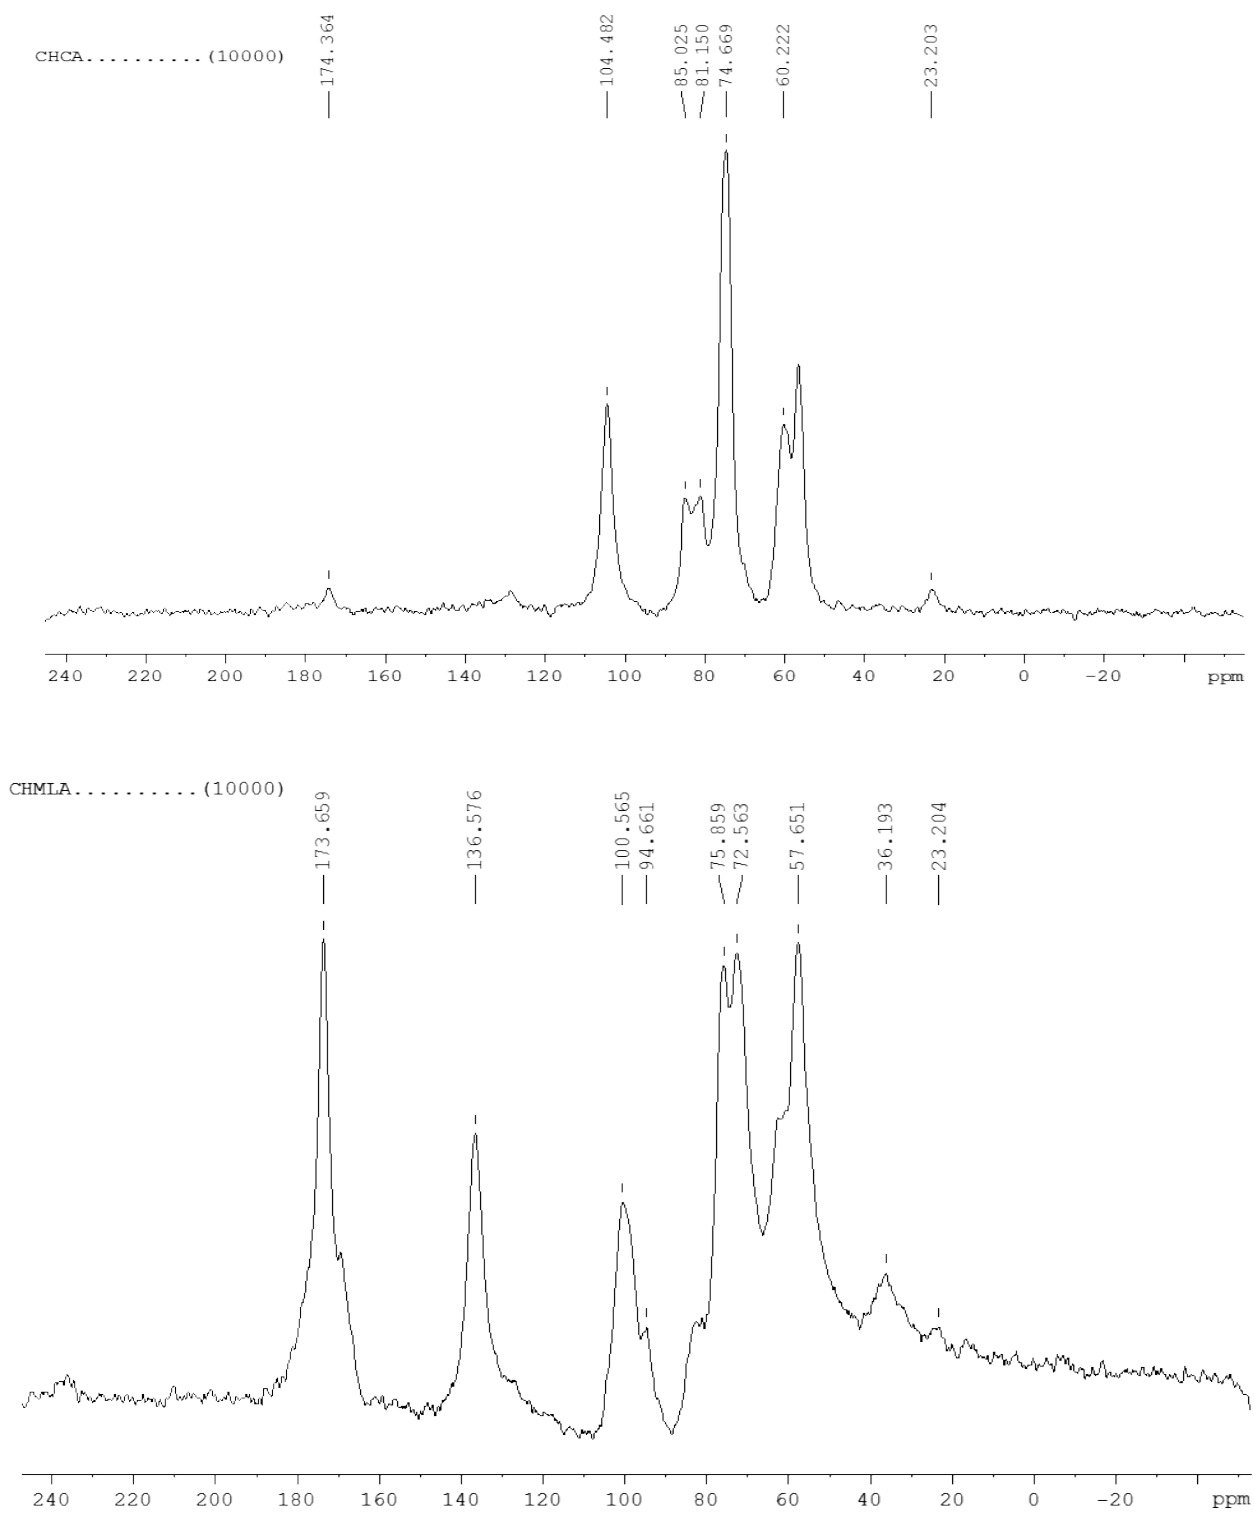

**Figure S1.** Solid state NMR spectrum of CHCA and CHMLA (control reactions)

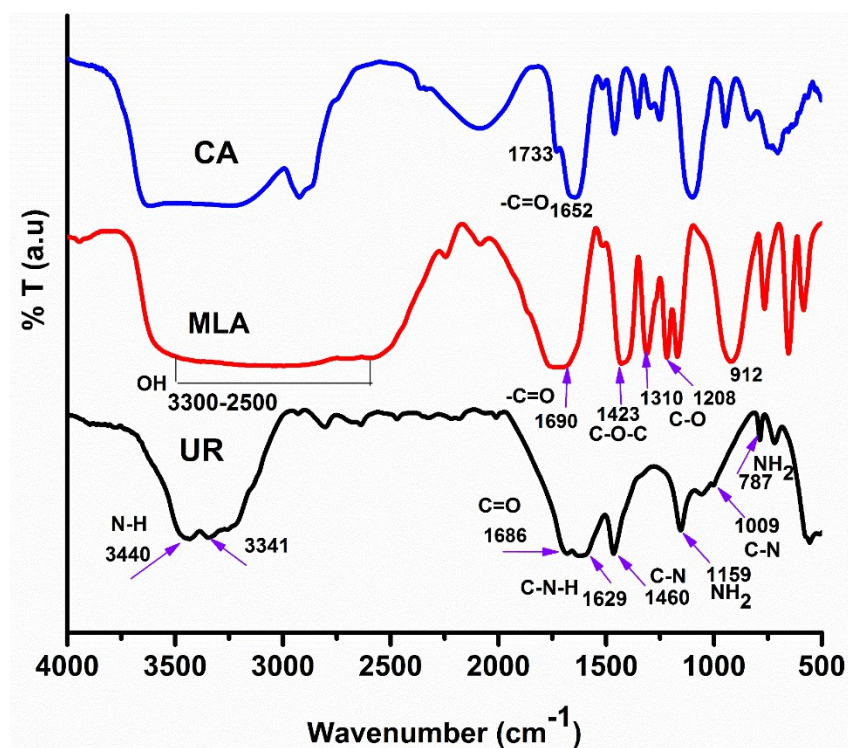

**Figure S2.** FT-IR spectrum of urea (UR), malonic acid (MLA) and cinnamaldehyde (CA).

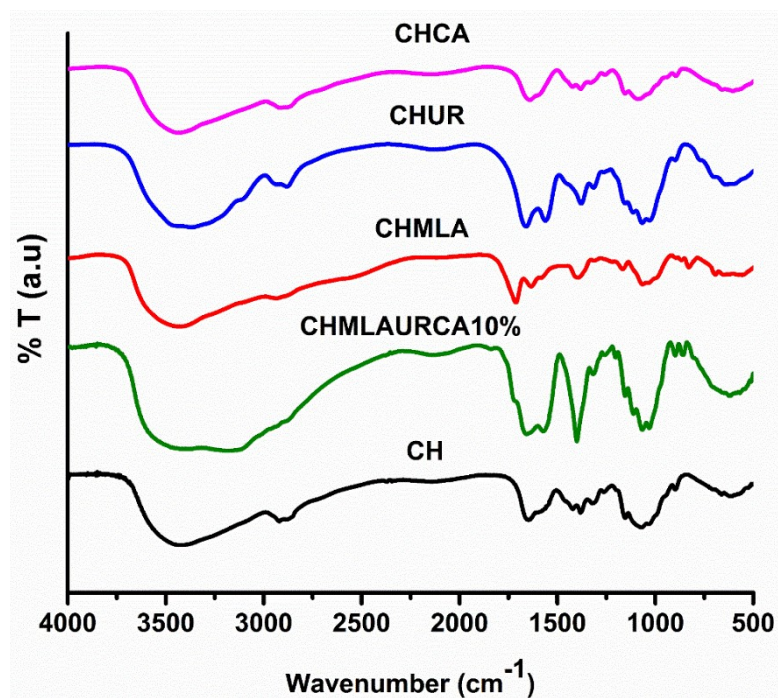

**Figure S3.** FT-IR spectrum of chitosan (CH), CHMLAURCA 10% and CHMLA, CHUR, CHCA (control reactions)

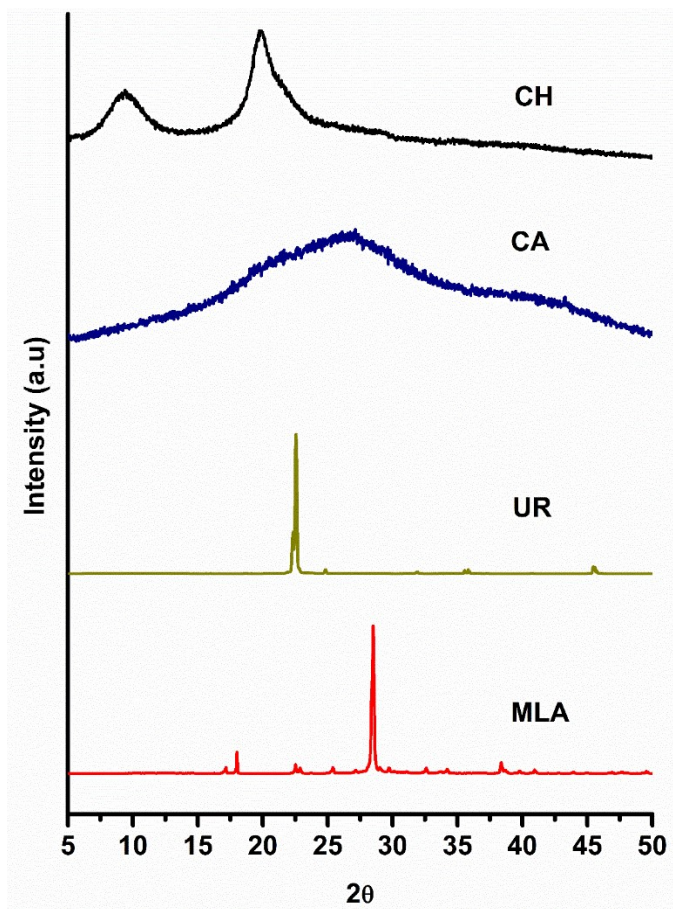

Figure S4. PXRD pattern of MLA, UR, CA and CH

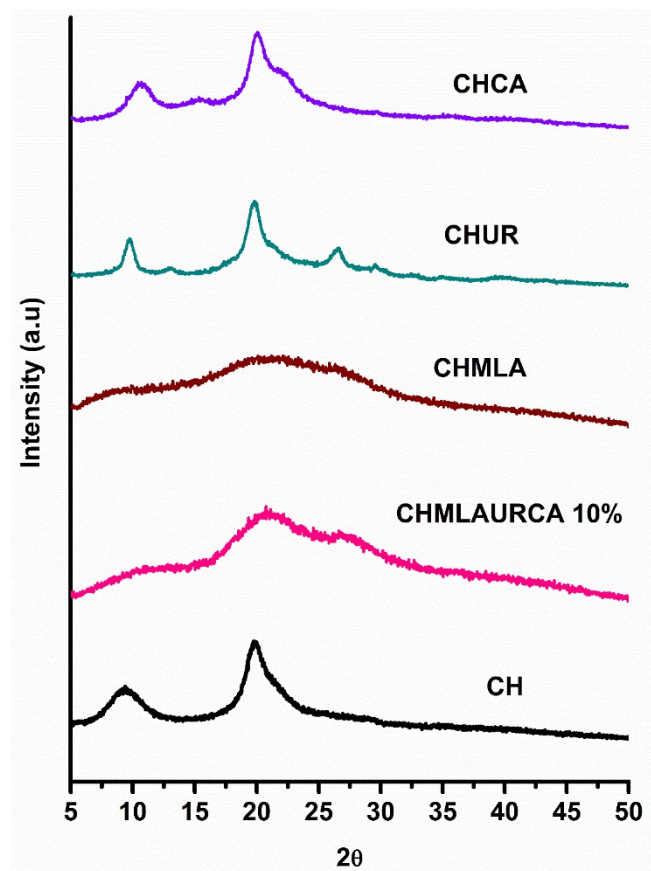

**Figure S5.** PXRD pattern of chitosan (CH), CHMLAURCA 10% and CHMLA, CHUR, CHCA (control reactions)

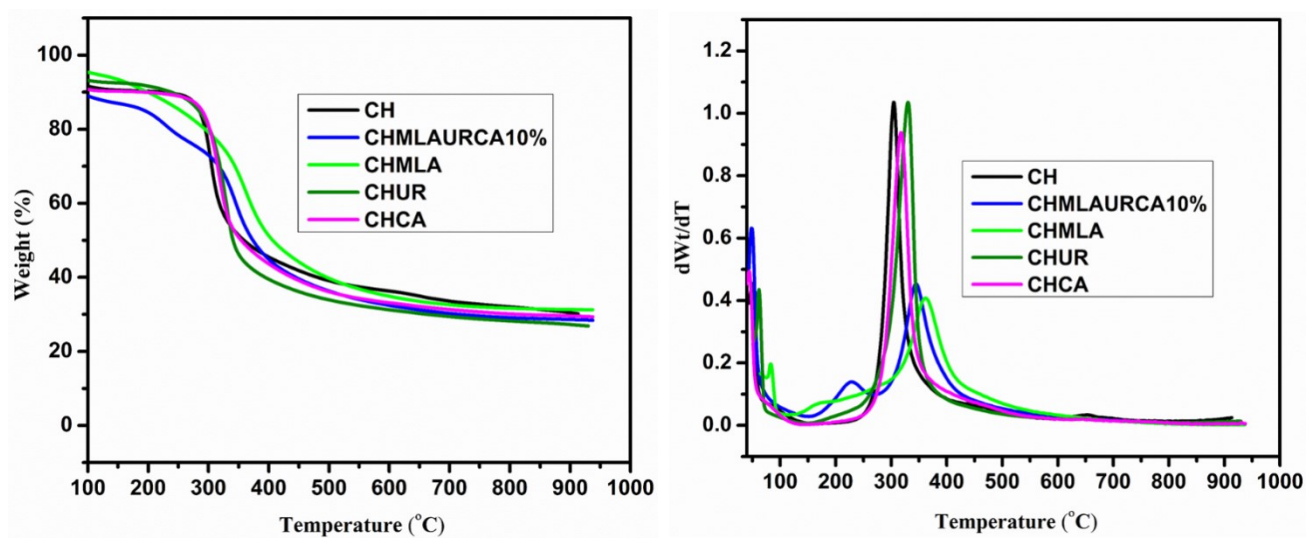

**Figure S6.** TGA and DTG of CH, CHMLAURCA 10% and CHMLA, CHUR, CHCA (control reactions).

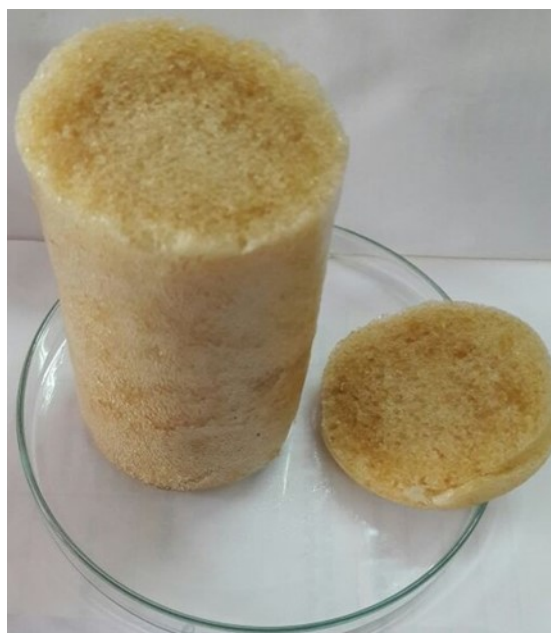

**Figure S7.** Photograph of as prepared CHMLAUR-CA 10% gel.
